# Supplementary material
Source: publisher figshare collection journal article supplement (https://acs.figshare.com/ndownloader/files/11286038)

**Supporting Information**  
**Effects of Desulfurization Processes on Polybrominated Dibenzo-p-dioxin and**  
**Dibenzofuran Emissions from Iron Ore Sintering**

Mengjing Wang<sup>†‡</sup>, Qianqian Li<sup>†§</sup>, Wenbin Liu<sup>\*†§</sup>

<sup>†</sup>State Key Laboratory of Environmental Chemistry and Ecotoxicology, Research Center for Eco-Environmental Sciences, Chinese Academy of Sciences, Beijing 100085, China

<sup>‡</sup>School of Civil and Environmental Engineering, Nanyang Technological University, 50 Nanyang Avenue, Singapore 639789, Singapore

<sup>§</sup>University of Chinese Academy of Sciences, Beijing 100049, China

\*Corresponding authors: Dr. Wenbin Liu, tel. +86-10-62849356, e-mail [liuwb@rcees.ac.cn](mailto:liuwb@rcees.ac.cn).

Supporting Information Contents:

Number of Tables: 2

Number of Figures: 8

Number of Pages: 12

## Supporting Information Contents

**Table S1.** Toxic equivalence factors for several polybrominated dibenzo-p-dioxins and dibenzofurans (PBDD/Fs) normalized to the value for 2,3,7,8-tetrachlorodibenzo-p-dioxin.

**Table S2.** PBDD/F emission factors (in units of  $\mu\text{g t}^{-1}$  and  $\mu\text{g TEQ t}^{-1}$ ) for the inlet and outlet stack gases, desulfurization products, and discarded fly ash.

**Figure S1.** PBDD/F concentration and PBDD/F TEQ mass balances for the desulfurization process (for the inlet and outlet stack gases and desulfurization products).

**Figure S2.** PBDD/F homolog distributions in the desulfurization product samples.

**Figure S3.** PBDD/F homolog distributions in the fly ash samples.

**Figure S4.** Removal efficiencies for the PBDF homologs.

**Figure S5.** PBDD/F congener profiles in the inlet and outlet stack gas samples.

**Figure S6.** PBDD/F congener profiles in the desulfurization product samples.

**Figure S7.** PBDD/F congener profiles in the fly ash samples.

**Figure S8.** Annual PBDD/F emissions in stack gases, desulfurization products, and discarded fly ash produced by sintering plants in China and the desulfurization product to stack gas PBDD/F concentration ratios and fly ash to stack gas PBDD/F concentration ratios between 2003 and 2015.

**Table S1.** Toxic equivalence factors for several polybrominated dibenzo-p-dioxins and dibenzofurans (PBDD/Fs) normalized to the value for 2,3,7,8-tetrachlorodibenzo-p-dioxin.

| PBDD/Fs       | WHO-TEF <sup>1</sup> |
|---------------|----------------------|
| 2378-TeBDD    | 1                    |
| 12378-PeBDD   | 1                    |
| 123478-HxBDD  | 0.1                  |
| 123678-HxBDD  | 0.1                  |
| 123789-HxBDD  | 0.1                  |
| 1234678-HpBDD | 0.01                 |
| OBDD          | 0.0003               |
| 2378-TeBDF    | 0.1                  |
| 12378-PeBDF   | 0.03                 |
| 23478-PeBDF   | 0.3                  |
| 123478-HxBDF  | 0.1                  |
| 1234678-HpBDF | 0.01                 |
| OBDF          | 0.0003               |

**Table S2.** PBDD/F emission factors (in units of  $\mu\text{g t}^{-1}$  and  $\mu\text{g TEQ t}^{-1}$ ) for the inlet and outlet stack gases, desulfurization products, and discarded fly ash.

|                     | Inlet |      | Outlet |       | Desulfurization product |       | Discarded fly ash |      |
|---------------------|-------|------|--------|-------|-------------------------|-------|-------------------|------|
|                     | Mass  | TEQ  | Mass   | TEQ   | Mass                    | TEQ   | Mass              | TEQ  |
| Small-scale Plants  | 12.7  | 0.37 | 0.87   | 0.039 | 7.88                    | 0.23  | 0.60              | 0.06 |
| Medium-scale Plants | 3.6   | 0.23 | 1.00   | 0.065 | 2.22                    | 0.22  | 0.36              | 0.03 |
| Large-scale Plants  | 2.6   | 0.14 | 0.14   | 0.023 | 1.56                    | 0.089 | 0.22              | 0.02 |

**Figure S1.** PBDD/F concentration and PBDD/F TEQ mass balances for the desulfurization process (for the inlet and outlet stack gases and desulfurization products).

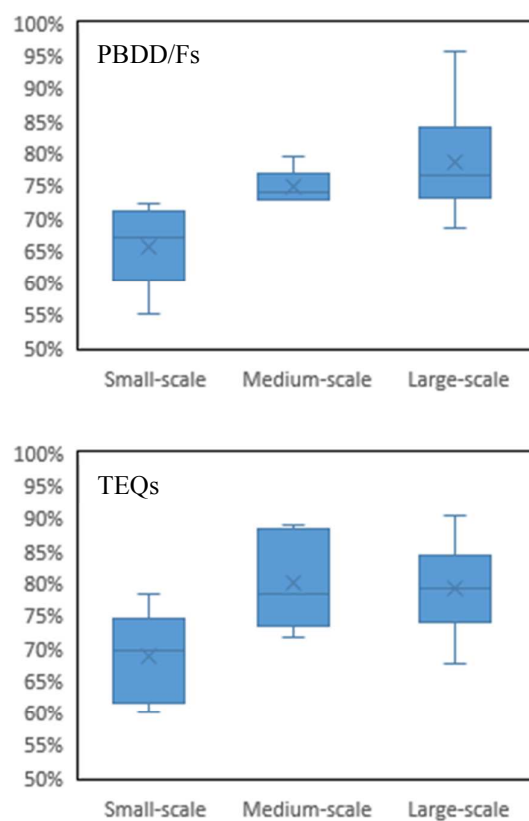

**Figure S2.** PBDD/F homolog distributions in the desulfurization product samples.

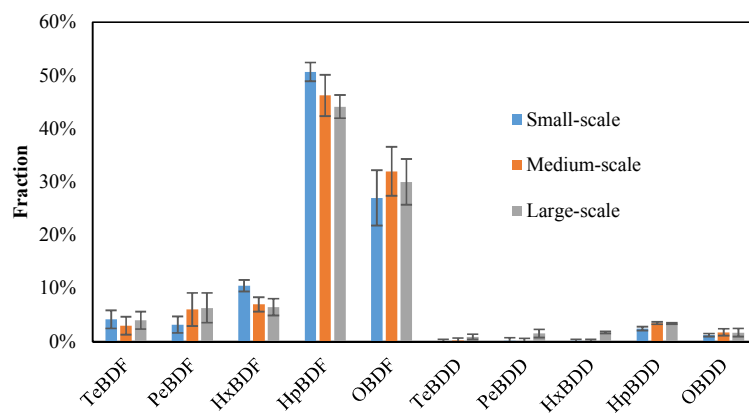

**Figure S3.** PBDD/F homolog distributions in the fly ash samples.

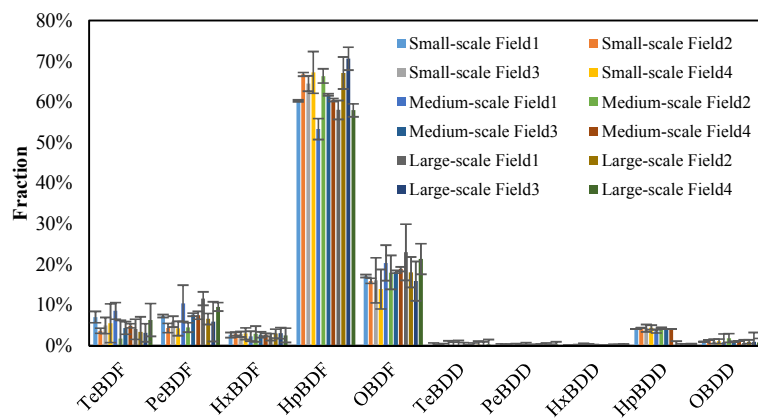

**Figure S4.** Removal efficiencies for the PBDF homologs.

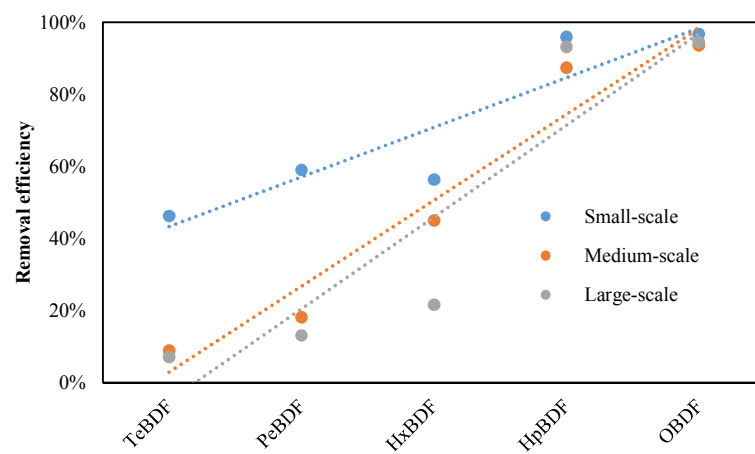

**Figure S5.** PBDD/F congener profiles in the inlet and outlet stack gas samples.

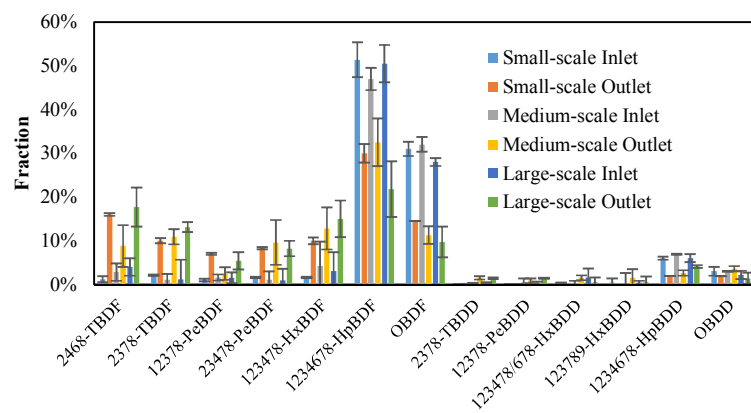

**Figure S6.** PBDD/F congener profiles in the desulfurization product samples.

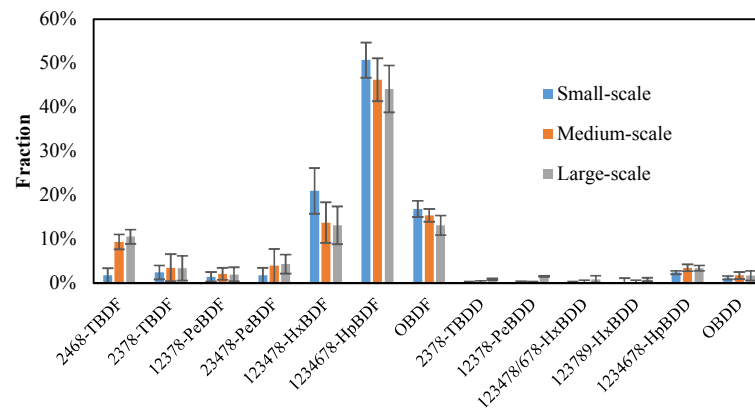

**Figure S7.** PBDD/F congener profiles in the fly ash samples.

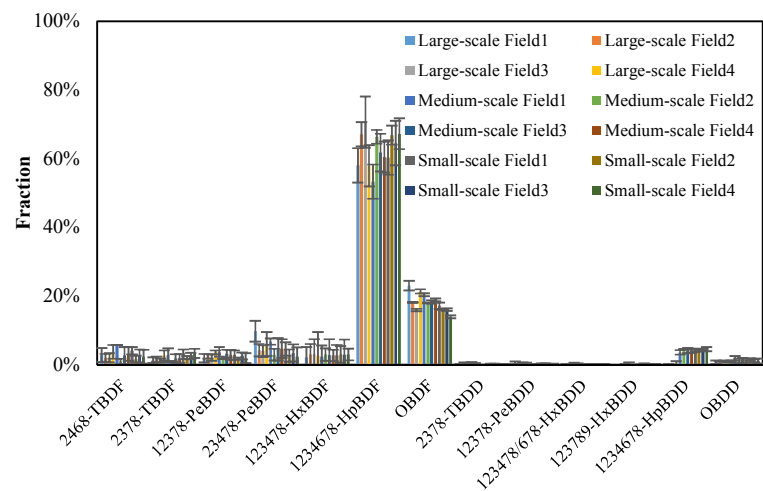

**Figure S8.** Annual PBDD/F emissions in stack gases, desulfurization products, and discarded fly ash produced by sintering plants in China and the desulfurization product to stack gas PBDD/F concentration ratios and fly ash to stack gas PBDD/F concentration ratios between 2003 and 2015.

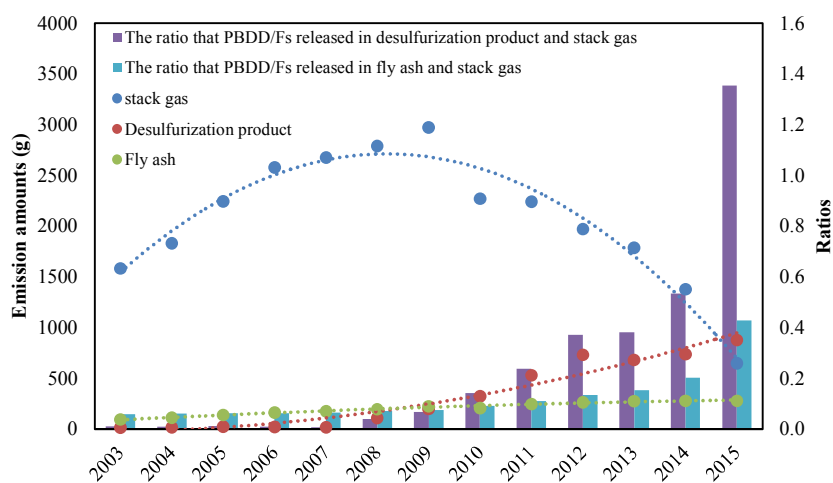

Supplement: Supplementary file 1 [file 11286038]
